# Supplementary material
Source: MDPI journal article supplement (https://www.mdpi.com/2311-7524/7/12/585)
Supplement: s1 [file s1]

**Table S1.** Changes in the ration of variable and minimal fluorescence (Fv/F0) during the growing season in different parts of the leaves (with mean  $\pm$  standard error)

| Days after forcing                       | Location A (30 mm from the tip)                                        |     | Location B (65 mm from the tip)                                         |     | Location C (100 mm from the tip)                                        |      | Location D (135 mm from the tip)                                        |     | Location E (170 mm from the tip)                                        |     |
|------------------------------------------|------------------------------------------------------------------------|-----|-------------------------------------------------------------------------|-----|-------------------------------------------------------------------------|------|-------------------------------------------------------------------------|-----|-------------------------------------------------------------------------|-----|
| <i>N. pseudonarcissus</i> ‘Dutch Master’ |                                                                        |     |                                                                         |     |                                                                         |      |                                                                         |     |                                                                         |     |
| 17                                       | nm                                                                     |     | 5.03±0.08                                                               | a   | nm                                                                      |      | nm                                                                      |     | nm                                                                      |     |
| 21                                       | nm                                                                     |     | 4.72±0.06                                                               | b   | nm                                                                      |      | nm                                                                      |     | nm                                                                      |     |
| 27                                       | nm                                                                     |     | 4.76±0.05                                                               | b   | nm                                                                      |      | nm                                                                      |     | nm                                                                      |     |
| 35                                       | 4.85±0.08                                                              | aA  | 4.63±0.10                                                               | bB  | 4.64±0.10                                                               | aB   | 4.58±0.16                                                               | aB  | nm                                                                      |     |
| 40                                       | 4.58±0.05                                                              | bC  | 4.64±0.05                                                               | bBC | 4.71±0.06                                                               | aAB  | 4.74±0.06                                                               | abA | 4.8±0.06                                                                | aA  |
| 49                                       | 4.59±0.05                                                              | bB  | 4.63±0.05                                                               | bB  | 4.67±0.06                                                               | aB   | 4.80±0.04                                                               | abA | 4.8±0.06                                                                | aA  |
| 56                                       | 4.33±0.05                                                              | cC  | 4.40±0.05                                                               | cBC | 4.47±0.07                                                               | bB   | 4.59±0.05                                                               | abA | 4.65±0.05                                                               | bA  |
| 62                                       | 3.85±0.25                                                              | dD  | 4.12±0.18                                                               | dCD | 4.28±0.14                                                               | bcBC | 4.44±0.08                                                               | abB | 4.65±0.10                                                               | bA  |
| 69                                       | 4.25±0.08                                                              | cC  | 4.55±0.15                                                               | cB  | 4.46±0.11                                                               | cB   | 4.65±0.07                                                               | abA | 4.74±0.06                                                               | bA  |
| 76                                       | 3.65±0.1                                                               | dD  | 3.94±0.12                                                               | cC  | 4.20±0.09                                                               | bcB  | 4.46±0.08                                                               | abA | 4.51±0.08                                                               | abA |
| 82                                       | 2.98±0.34                                                              | eC  | 4.02±0.10                                                               | cB  | 4.14±0.10                                                               | bcAB | 4.18±0.09                                                               | cAB | 4.29±0.08                                                               | cA  |
| 91                                       | 2.81±0.43                                                              | eB  | 3.60±0.14                                                               | dA  | 3.63±0.17                                                               | eA   | 3.71±0.14                                                               | dA  | 3.83±0.11                                                               | dA  |
| Trend curve equation and fit strength    | y = -0.0006x <sup>2</sup> + 0.0375x + 4.025<br>R <sup>2</sup> = 0.902  |     | y = -0.0002x <sup>2</sup> + 0.0134x + 4.4932<br>R <sup>2</sup> = 0.7903 |     | y = -0.0003x <sup>2</sup> + 0.0215x + 4.3033<br>R <sup>2</sup> = 0.8994 |      | y = -0.0005x <sup>2</sup> + 0.0498x + 3.5373<br>R <sup>2</sup> = 0.8907 |     | y = -0.0006x <sup>2</sup> + 0.0567x + 3.3618<br>R <sup>2</sup> = 0.928  |     |
| <i>N. poeticus</i> :                     |                                                                        |     |                                                                         |     |                                                                         |      |                                                                         |     |                                                                         |     |
| 16                                       | 5.11±0.03                                                              | aA  | 5.08±0.04                                                               | aA  | 5.13±0.04                                                               | aA   |                                                                         |     |                                                                         |     |
| 22                                       | 4.99±0.05                                                              | aB  | 5.00±0.04                                                               | aB  | 5.03±0.05                                                               | aAB  | 5.10±0.03                                                               | aA  | 5.01±0.03                                                               | aB  |
| 29                                       | 4.92±0.03                                                              | aD  | 4.99±0.04                                                               | aC  | 5.11±0.04                                                               | aA   | 5.14±0.04                                                               | aA  | 4.98±0.09                                                               | aB  |
| 35                                       | 4.67±0.04                                                              | bC  | 4.81±0.04                                                               | bB  | 4.95±0.05                                                               | aA   | 4.95±0.03                                                               | aA  | 4.92±0.04                                                               | aA  |
| 42                                       | 4.77±0.10                                                              | bC  | 4.89±0.09                                                               | abB | 5.05±0.11                                                               | aAB  | 5.04±0.10                                                               | aAB | 5.08±0.08                                                               | aA  |
| 48                                       | 4.39±0.12                                                              | cC  | 4.63±0.06                                                               | abB | 4.68±0.09                                                               | bAB  | 4.80±0.09                                                               | bA  | 4.71±0.08                                                               | bAB |
| 57                                       | 4.02±0.13                                                              | dB  | 4.52±0.11                                                               | bcA | 4.60±0.13                                                               | bA   | 4.67±0.13                                                               | bA  | 4.52±0.16                                                               | abA |
| 64                                       | 3.91±0.34                                                              | dB  | 4.45±0.13                                                               | bcA | 4.42±0.18                                                               | bcA  | 4.58±0.13                                                               | bA  | 4.39±0.20                                                               | cAB |
| 70                                       | 3.62±0.16                                                              | deB | 4.07±0.12                                                               | dA  | 4.18±0.13                                                               | bcA  | 4.24±0.14                                                               | cA  | 4.20±0.24                                                               | dA  |
| 77                                       | 3.33±0.24                                                              | eB  | 4.02±0.14                                                               | dA  | 4.22±0.16                                                               | bcA  | 4.34±0.23                                                               | cA  | 4.20±0.24                                                               | cA  |
| 85                                       | 2.37±0.33                                                              | fC  | 3.68±0.15                                                               | eB  | 4.01±0.15                                                               | bcA  | 4.13±0.18                                                               | cA  | 4.03±0.15                                                               | cA  |
| 92                                       | 2.20±0.26                                                              | fC  | 3.27±0.12                                                               | fB  | 3.59±0.11                                                               | bcA  | 3.61±0.13                                                               | dA  | 3.60±0.18                                                               | eA  |
| Trend curve equation and fit strength    | y = -0.0005x <sup>2</sup> + 0.0139x + 4.894<br>R <sup>2</sup> = 0.9747 |     | y = -0.0003x <sup>2</sup> + 0.0111x + 4.8956<br>R <sup>2</sup> = 0.9876 |     | y = -0.0002x <sup>2</sup> + 0.0009x + 5.1707<br>R <sup>2</sup> = 0.9685 |      | y = -0.0002x <sup>2</sup> + 0.0062x + 5.0888<br>R <sup>2</sup> = 0.9647 |     | y = -0.0002x <sup>2</sup> - 0.0013x + 5.1749<br>R <sup>2</sup> = 0.9322 |     |

next to the mean and standard deviation, the different letters represent the difference between the cultivars or the treatment solution at the  $p < 0.05$  level. different lower-case letters: significant difference between the measuring dates in the same location; different capital letters: significant difference between the measuring places on the leaf in the same day. nm= not measurable in non-destructive way

**Table S2.** Change of relative chlorophyll content (CCI) during the growing season in different parts of the leaves (with mean  $\pm$  standard error)

| Days after forcing                       | Location A (30 mm from the tip)                                         |      | Location B (65 mm from the tip)                                         |      | Location C (100 mm from the tip)                                        |      | Location D (135 mm from the tip)                                        |      | Location E (170 mm from the tip)                                        |     |
|------------------------------------------|-------------------------------------------------------------------------|------|-------------------------------------------------------------------------|------|-------------------------------------------------------------------------|------|-------------------------------------------------------------------------|------|-------------------------------------------------------------------------|-----|
| <i>N. pseudonarcissus</i> ‘Dutch Master’ |                                                                         |      |                                                                         |      |                                                                         |      |                                                                         |      |                                                                         |     |
| 17                                       | nm                                                                      |      | 92.84±3.07                                                              | bc   | nm                                                                      |      | nm                                                                      |      | nm                                                                      |     |
| 21                                       | nm                                                                      |      | 101.55±2.22                                                             | ab   | nm                                                                      |      | nm                                                                      |      | nm                                                                      |     |
| 27                                       | nm                                                                      |      | 115.93±4.54                                                             | a    | nm                                                                      |      | nm                                                                      |      | nm                                                                      |     |
| 35                                       | 82.11±4.59                                                              | bAB  | 92.24±3.00                                                              | bcB  | 98.48±3.52                                                              | abAB | 107.23±5.43                                                             | aA   | nm                                                                      |     |
| 40                                       | 106.79±2.72                                                             | aA   | 100.79±2.36                                                             | abAB | 100.83±3.33                                                             | abA  | 89.06±2.75                                                              | aC   | 88.06±6.02                                                              | aC  |
| 49                                       | 107.16±5.96                                                             | aA   | 102.42±4.11                                                             | abAB | 100.52±3.86                                                             | abAB | 94.93±4.18                                                              | bB   | 83.75±4.22                                                              | bcC |
| 56                                       | 107.24±5.83                                                             | aA   | 111.13±2.85                                                             | aA   | 107.70±3.23                                                             | aA   | 106.44±4.95                                                             | bA   | 92.70±5.09                                                              | aB  |
| 62                                       | 93.21±9.79                                                              | abA  | 98.96±7.99                                                              | abA  | 94.65±5.13                                                              | abA  | 89.42±4.76                                                              | bcA  | 82.53±4.18                                                              | bcB |
| 69                                       | 99.48±5.69                                                              | aAB  | 107.82±4.96                                                             | abA  | 103.88±3.70                                                             | aAB  | 95.63±5.17                                                              | bcB  | 79.81±6.11                                                              | bcC |
| 76                                       | 73.74±5.01                                                              | cB   | 92.74±4.93                                                              | bcA  | 94.84±5.08                                                              | abA  | 81.25±4.17                                                              | cB   | 72.10±5.64                                                              | cdB |
| 82                                       | 70.72±4.22                                                              | cBC  | 82.40±3.08                                                              | dA   | 77.53±2.83                                                              | cAB  | 67.67±3.71                                                              | dC   | 57.58±3.61                                                              | eD  |
| 91                                       | 26.82±7.57                                                              | dA   | 36.43±7.40                                                              | eA   | 38.71±6.06                                                              | dA   | 35.94±4.60                                                              | eA   | 30.88±3.60                                                              | fA  |
| Trend curve equation and fit strength    | y = -0.0454x <sup>2</sup> + 4.5249x - 3.9921<br>R <sup>2</sup> = 0.9521 |      | y = -0.0568x <sup>2</sup> + 6.4224x - 70.509<br>R <sup>2</sup> = 0.9194 |      | y = -0.0503x <sup>2</sup> + 5.6019x - 48.113<br>R <sup>2</sup> = 0.9087 |      | y = -0.051x <sup>2</sup> + 5.7095x - 59.138<br>R <sup>2</sup> = 0.9541  |      | y = -0.0372x <sup>2</sup> + 3.8644x - 10.227<br>R <sup>2</sup> = 0.9681 |     |
| <i>N. poeticus</i> :                     |                                                                         |      |                                                                         |      |                                                                         |      |                                                                         |      |                                                                         |     |
| 16                                       | 87.08±4.82                                                              | aA   | 72.82±3.13                                                              | bcB  | 68.68±4.00                                                              | b    |                                                                         |      |                                                                         |     |
| 22                                       | 63.34±6.65                                                              | bBC  | 83.39±4.31                                                              | aA   | 78.01±3.52                                                              | aA   | 69.51±3.37                                                              | aB   | 61.24±4.77                                                              | aC  |
| 29                                       | 64.94±5.24                                                              | bBC  | 77.09±5.35                                                              | aA   | 70.37±4.44                                                              | bAB  | 69.03±4.47                                                              | aAB  | 58.22±4.04                                                              | aC  |
| 35                                       | 59.14±5.83                                                              | bC   | 77.09±4.54                                                              | aA   | 80.74±4.34                                                              | aA   | 70.36±3.70                                                              | aB   | 60.72±3.94                                                              | aC  |
| 42                                       | 53.39±4.99                                                              | cdB  | 56.51±4.89                                                              | dB   | 66.28±3.77                                                              | bA   | 51.31±3.68                                                              | dB   | 52.63±4.26                                                              | aB  |
| 48                                       | 56.06±4.94                                                              | bcCD | 72.88±4.44                                                              | bcA  | 69.39±3.19                                                              | bAB  | 64.74±3.06                                                              | aBC  | 53.09±3.92                                                              | aD  |
| 57                                       | 53.42±4.36                                                              | bcC  | 59.79±5.11                                                              | dABC | 65.71±3.30                                                              | bA   | 61.53±3.26                                                              | bcAB | 54.88±3.69                                                              | aBC |
| 64                                       | 51.04±3.87                                                              | cdA  | 52.18±4.39                                                              | dA   | 52.88±5.00                                                              | cA   | 47.66±3.85                                                              | dA   | 40.43±3.37                                                              | deB |
| 70                                       | 41.97±3.69                                                              | eAB  | 54.29±3.52                                                              | dA   | 58.70±3.66                                                              | cA   | 54.31±3.46                                                              | dA   | 44.62±4.36                                                              | bcB |
| 77                                       | 34.74±3.86                                                              | fC   | 50.03±5.09                                                              | eAB  | 55.24±5.12                                                              | cA   | 48.07±4.15                                                              | dAB  | 44.62±4.36                                                              | bcB |
| 85                                       | 26.76±4.68                                                              | gC   | 36.01±3.32                                                              | fB   | 44.18±3.18                                                              | dA   | 43.71±3.59                                                              | deA  | 40.25±3.05                                                              | deA |
| 92                                       | 9.23±1.38                                                               | hC   | 11.85±1.65                                                              | gB   | 15.49±2.29                                                              | eAB  | 16.81±2.02                                                              | fA   | 18.86±2.18                                                              | fA  |
| Trend curve equation and fit strength    | y = -0.0127x <sup>2</sup> + 0.7187x + 51.882<br>R <sup>2</sup> = 0.9684 |      | y = -0.0104x <sup>2</sup> + 0.3361x + 75.717<br>R <sup>2</sup> = 0.8789 |      | y = -0.0139x <sup>2</sup> + 0.8565x + 61.716<br>R <sup>2</sup> = 0.8765 |      | y = -0.0149x <sup>2</sup> + 0.9745x + 58.341<br>R <sup>2</sup> = 0.8771 |      | y = -0.0082x <sup>2</sup> + 0.4455x + 52.892<br>R <sup>2</sup> = 0.8281 |     |

next to the mean and standard deviation, the different letters represent the difference between the cultivars or the treatment solution at the  $p < 0.05$  level. different lower case letters: significant difference between the measuring dates in the same location; different capital letters: significant difference between the measuring place on the leaf in the same day.

nm= not measurable
